# Supplementary material
Source: Royal Society of Chemistry journal article supplement (doi:10.1039/d6tb00753h)
Supplement: d6tb00753h1.pdf [file d6tb00753h1.pdf]

Supplementary Information (SI) for Journal of Materials Chemistry B.

This journal is © The Royal Society of Chemistry 2025

# Highly Stable Nanosized Lucigenin@PS-COOH: A Robust Chemiluminescence System for Sensitive cTnT Analysis

Fugang Li,<sup>a</sup> Qiang Li,<sup>\*c</sup> Feng Chen,<sup>a</sup> Chenxu Yan,<sup>b</sup> Yongxi Zhao,<sup>a</sup> and Zhiqian Guo<sup>\*b</sup>

---

[a] F. Li, Prof. Dr. F. Chen, Prof. Dr. Y. Zhao

Institute of Analytical Chemistry and Instrument for Life Science,  
The Key Laboratory of Biomedical Information Engineering of Ministry of Education,  
School of Life Science and Technology,  
Xi'an Jiaotong University, Xi'an, Shaanxi, 710049, PR China  
E-mail: chenxuyan@ecust.edu.cn;

[b] Prof. Dr. Z. Guo, Prof. Dr. C. Yan

Key Laboratory for Advanced Materials and Joint International Research Laboratory of Precision Chemistry and Molecular Engineering,  
Shanghai Key Laboratory of Functional Materials Chemistry,  
Feringa Nobel Prize Scientist Joint Research Center, Institute of Fine Chemicals,  
Frontiers Science Center for Materiobiology and Dynamic Chemistry,  
School of Chemistry and Molecular Engineering  
East China University of Science and Technology, Shanghai 200237, China  
E-mail: guozq@ecust.edu.cn;

[c] Dr. Q. Li

National Key Laboratory of Intelligent Tracking and Forecasting for Infectious Diseases,  
National Institute of Parasitic Diseases at Chinese Center for Disease Control and Prevention,  
Chinese Center for Tropical Diseases Research, National Research Center for Tropical Diseases,  
Key Laboratory of Parasite and Vector Biology, National Health Commission,  
WHO Collaborating Center for Tropical Diseases, National Center for International Research on Tropical Diseases,  
Ministry of Science and Technology, Shanghai 20025, China  
E-mail: liqiang@nipd.chinacdc.cn.

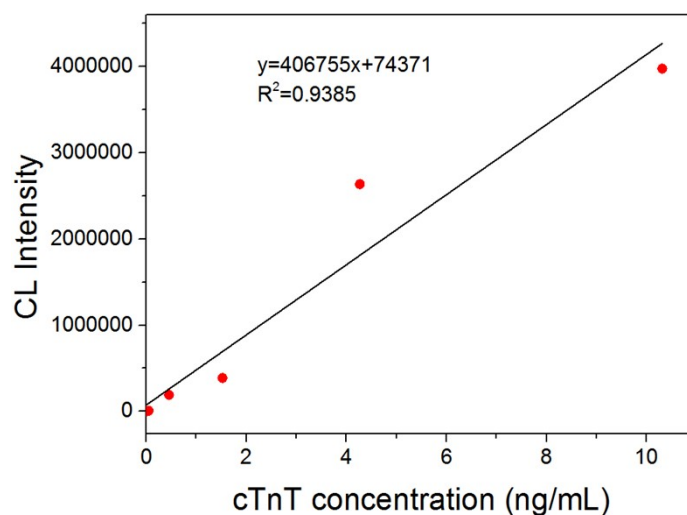

**Fig S1.** Standard curve of chemiluminescence (CL) intensity vs. the concentration of the cTnT calibrated substance using AE.

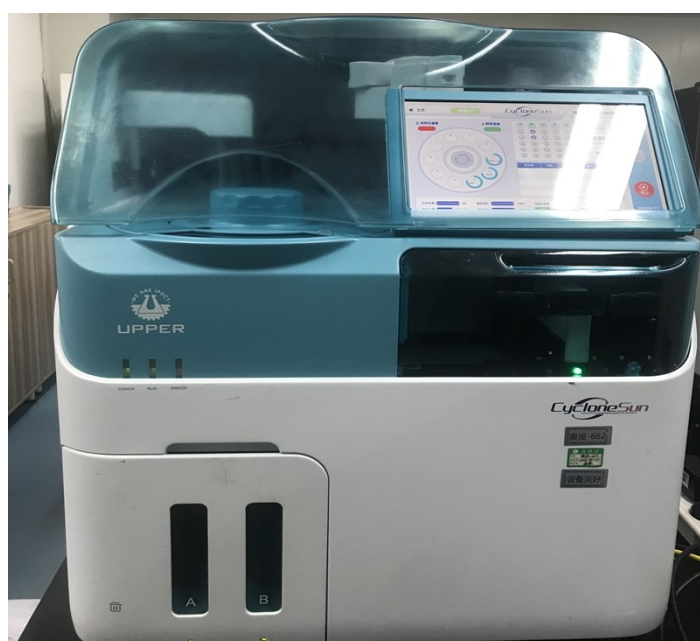

**Fig S2.** UPPER CycloneSun chemiluminescence automatic immunoanalyzer.

**Table S1** Chemiluminescence (CL) intensities of lucigenin@PS-COOH and acridinium ester in response to increasing test values of cTnT calibrated substance.

|   | cTnT calibrated substance<br>(ng/mL) | CL intensity of lucigenin@PS-COOH (a.u.) | CL intensity of acridinium ester<br>(a.u.) |
|---|--------------------------------------|------------------------------------------|--------------------------------------------|
| 1 | 0                                    | 1106                                     | 813                                        |
| 2 | 0.046                                | 11992                                    | 7864                                       |
| 3 | 0.454                                | 151274                                   | 191368                                     |
| 4 | 1.523                                | 596965                                   | 387524                                     |
| 5 | 4.269                                | 1817255                                  | 2636882                                    |
| 6 | 10.315                               | 4772407                                  | 3976754                                    |

**Table S2** Repeated measurements of the cTnT quality control substance used to determined assay sensitivity ( 0.32 ng/L) and coefficient of variation (CV, 7.77%).

|         | Test (ng/mL) |
|---------|--------------|
| 1       | 0.28         |
| 2       | 0.31         |
| 3       | 0.29         |
| 4       | 0.28         |
| 5       | 0.33         |
| 6       | 0.32         |
| 7       | 0.31         |
| 8       | 0.35         |
| 9       | 0.28         |
| 10      | 0.30         |
| Average | 0.305        |

**Table S3** Comparison of detection kit and this work

|               | detection limit | calibration range, R <sup>2</sup> | CV    |
|---------------|-----------------|-----------------------------------|-------|
| detection kit | ≤ 0.3 ng/mL     | ≥ 0.9900                          | ≤ 10% |
| This work     | 0.25 ng/mL      | 0.9988                            | 7.77% |

**Table S4** Comparison of Longhua Hospital results and this work for 50 clinical serum samples. The difference for each sample was within 15%, and the overall difference did not exceed 15%.

| Sample | Longhua (ng/mL) | This work (ng/mL) | Comparison |
|--------|-----------------|-------------------|------------|
| 1      | 7.985           | 7.707             | 103.60%    |
| 2      | 3.540           | 3.264             | 108.47%    |
| 3      | 6.547           | 6.239             | 104.94%    |
| 4      | 5.018           | 4.707             | 106.61%    |
| 5      | 6.321           | 6.010             | 105.17%    |
| 6      | 5.234           | 4.921             | 106.36%    |
| 7      | 7.540           | 7.250             | 104.00%    |
| 8      | 5.497           | 5.183             | 106.06%    |
| 9      | 4.597           | 4.292             | 107.12%    |
| 10     | 2.750           | 2.512             | 109.49%    |
| 11     | 4.026           | 3.733             | 107.84%    |
| 12     | 7.005           | 6.704             | 104.49%    |
| 13     | 1.057           | 0.971             | 108.90%    |
| 14     | 8.295           | 8.027             | 103.34%    |
| 15     | 1.689           | 1.531             | 110.29%    |
| 16     | 2.526           | 2.301             | 109.75%    |
| 17     | 4.506           | 4.202             | 107.23%    |
| 18     | 4.521           | 4.217             | 107.21%    |
| 19     | 2.451           | 2.231             | 109.84%    |
| 20     | 4.698           | 4.391             | 106.99%    |

|    |       |       |         |
|----|-------|-------|---------|
| 21 | 1.987 | 1.803 | 110.23% |
| 22 | 3.009 | 2.756 | 109.17% |
| 23 | 3.210 | 2.948 | 108.91% |
| 24 | 0.889 | 0.826 | 107.66% |
| 25 | 4.351 | 4.050 | 107.42% |
| 26 | 1.240 | 1.131 | 109.67% |
| 27 | 8.015 | 7.738 | 103.58% |
| 28 | 0.705 | 0.670 | 105.28% |
| 29 | 1.058 | 0.971 | 108.90% |
| 30 | 0.594 | 0.577 | 102.92% |
| 31 | 0.720 | 0.682 | 105.53% |
| 32 | 0.654 | 0.627 | 104.31% |
| 33 | 0.447 | 0.457 | 97.84%  |
| 34 | 0.689 | 0.656 | 104.99% |
| 35 | 0.508 | 0.506 | 100.31% |
| 36 | 0.298 | 0.338 | 88.08%  |
| 37 | 0.254 | 0.304 | 83.50%  |
| 38 | 1.241 | 1.132 | 109.67% |
| 39 | 0.702 | 0.667 | 105.22% |
| 40 | 0.825 | 0.771 | 106.99% |
| 41 | 0.775 | 0.729 | 106.36% |
| 42 | 0.651 | 0.624 | 104.25% |
| 43 | 0.334 | 0.367 | 91.11%  |
| 44 | 0.497 | 0.497 | 99.91%  |
| 45 | 0.608 | 0.589 | 103.27% |
| 46 | 2.999 | 2.747 | 109.18% |
| 47 | 1.442 | 1.310 | 110.10% |
| 48 | 0.278 | 0.323 | 86.13%  |
| 49 | 0.560 | 0.549 | 101.99% |
| 50 | 0.560 | 0.549 | 101.99% |
